# Supplementary material for: Coexistence of SOS-Dependent and SOS-Independent Regulation of DNA Repair Genes in Radiation-Resistant Deinococcus Bacteria
Source: MDPI journal article supplement (doi:10.3390/cells10040924), 2021-04-16
Supplement: s1 [file s1]

**Supplementary Table for:**

Coexistence of SOS-dependent and SOS-independent regulation of DNA repair genes in radiation-resistant *Deinococcus* bacteria

Laurence Blanchard and Arjan de Groot

**Supplementary Table S1.** Accession numbers of the proteins encoded by *lexA-imuY-imuB-C-dnaE2* cassettes in *Deinococcus* bacteria.

| species                          | LexA           | ImuY           | ImuB-C         | DnaE2          |
|----------------------------------|----------------|----------------|----------------|----------------|
| <i>D. deserti</i>                | WP_012694770.1 | WP_012694771.1 | WP_012694772.1 | ACO47650.1     |
| <i>D. aerolatus</i>              | WP_188974186.1 | WP_188974185.1 | WP_188974184.1 | WP_188974183.1 |
| <i>D. aquiradiocola</i>          | WP_188961532.1 | WP_188961531.1 | WP_188961530.1 | WP_188961711.1 |
| <i>D. budaensis</i>              | WP_184027903.1 | WP_184027906.1 | WP_184027909.1 | WP_184027912.1 |
| <i>D. cellulosilyticus</i>       | WP_146887394.1 | WP_146887392.1 | WP_146887390.1 | WP_186816141.1 |
| <i>D. cellulosilyticus</i>       | WP_146891023.1 | WP_146891026.1 | WP_146891029.1 | WP_146891032.1 |
| <i>D. daejeonensis</i>           | WP_189059405.1 | WP_189059403.1 | WP_189059400.1 | WP_189059460.1 |
| <i>D. daejeonensis</i>           | WP_119672580.1 | WP_189056591.1 | WP_119672233.1 | WP_189056413.1 |
| <i>D. ficus</i> 2009             | WP_081425875.1 | WP_022800705.1 | WP_022800706.1 | WP_022800707.1 |
| <i>D. ficus</i> 2009             | WP_022803141.1 | WP_022803140.1 | WP_022803139.1 | WP_028306285.1 |
| <i>D. ficus</i> CC-FR2-10        | WP_081425875.1 | WP_027463211.1 | WP_043778331.1 | WP_043778329.1 |
| <i>D. ficus</i> CC-FR2-10        | WP_027464396.1 | WP_027464397.1 | WP_027464398.1 | WP_027464399.1 |
| <i>D. ficus</i><br>CGMCC 1.18438 | WP_191241408.1 | WP_191241360.1 | WP_191241359.1 | WP_191241358.1 |
| <i>D. grandis</i>                | WP_058979539.1 | WP_058979537.1 | WP_058979535.1 | WP_083524274.1 |
| <i>D. grandis</i>                | WP_058979356.1 | WP_058979066.1 | WP_058979068.1 | WP_058979070.1 |
| <i>D. humi</i>                   | WP_184135053.1 | WP_184135056.1 | WP_184135059.1 | WP_184135062.1 |
| <i>D. humi</i>                   | WP_184137688.1 | WP_184137686.1 | WP_184137684.1 | WP_184137682.1 |
| <i>D. indicus</i>                | WP_055362527.1 | WP_055362526.1 | WP_055362525.1 | WP_055362522.1 |
| <i>D. indicus</i>                | WP_191301194.1 | WP_191301185.1 | WP_191301183.1 | WP_191301181.1 |
| <i>D. koreensis</i>              | WP_103311688.1 | WP_103311689.1 | WP_103311690.1 | WP_103311691.1 |
| <i>D. koreensis</i>              | WP_103314225.1 | WP_103314224.1 | WP_103314223.1 | WP_103314222.1 |
| <i>D. malanensis</i>             | WP_189010110.1 | WP_189010108.1 | WP_189010106.1 | WP_189010105.1 |
| <i>D. marmoris</i><br>DSM 12784  | WP_029483416.1 | WP_029483417.1 | WP_029483418.1 | WP_051655457.1 |
| <i>D. marmoris</i><br>PAMC 26562 | WP_075834676.1 | WP_075834674.1 | WP_075834672.1 | WP_139323019.1 |
| <i>D. metalli</i>                | WP_184114207.1 | WP_184114304.1 | WP_184114205.1 | WP_184114203.1 |
| <i>D. metalli</i>                | WP_191240085.1 | WP_184114723.1 | WP_184114724.1 | WP_184114726.1 |
| <i>D. peraridillitoris</i>       | WP_015236734.1 | WP_015236735.1 | WP_015236736.1 | WP_015236737.1 |
| <i>D. radiopugnans</i>           | WP_139404716.1 | WP_139404715.1 | WP_139404714.1 | WP_139404713.1 |
| <i>D. radiotolerans</i>          | WP_189070213.1 | WP_189070212.1 | WP_189070211.1 | WP_189070209.1 |
| <i>D. roseus</i>                 | WP_189009241.1 | WP_189009226.1 | WP_189009229.1 | WP_189009232.1 |
| <i>D. roseus</i>                 | WP_189005274.1 | WP_189005275.1 | WP_189005276.1 | WP_189005277.1 |
| <i>D. ruber</i>                  | WP_189091652.1 | WP_189091653.1 | WP_189091654.1 | WP_189091656.1 |
| <i>D. saudiensis</i>             | WP_188845450.1 | WP_188845448.1 | WP_188845446.1 | WP_188845442.1 |
| <i>D. saudiensis</i>             | WP_188846919.1 | WP_188846920.1 | WP_188846921.1 | WP_188846922.1 |
| <i>D. sedimenti</i>              | WP_189074292.1 | WP_189074291.1 | WP_189074290.1 | WP_189074289.1 |
| <i>D. xiangnanensis</i>          | MXV18662.1     | MXV18663.1     | MXV18664.1     | MXV18665.1     |
| <i>D. yavapaiensis</i>           | PYE56319.1     | PYE56320.1     | PYE56321.1     | PYE56322.1     |

The strain number is mentioned only when more than one strain of a species is sequenced. The cassettes in the different bacteria were found using protein BLAST (blastp) at <https://blast.ncbi.nlm.nih.gov/Blast.cgi> with default settings and with *D. deserti* ImuY as query (BLAST searches performed February 2021); then the upstream and downstream regions of the identified *imuY* homologs were analyzed, which showed that these *imuY* genes are directly adjacent to *lexA*, *imuB-C* and *dnaE2* as in *D. deserti*.
